# Supplementary material for: Neutrophil extracellular traps drive intestinal microvascular endothelial ferroptosis by impairing Fundc1-dependent mitophagy
Source: PubMed Central journal article supplement — Redox Biol. 2023 Oct 4;67:102906. doi: 10.1016/j.redox.2023.102906 (PMC10579540; doi:10.1016/j.redox.2023.102906), 2023-10-04
Supplement: mmc1.pdf [file mmc1.pdf]

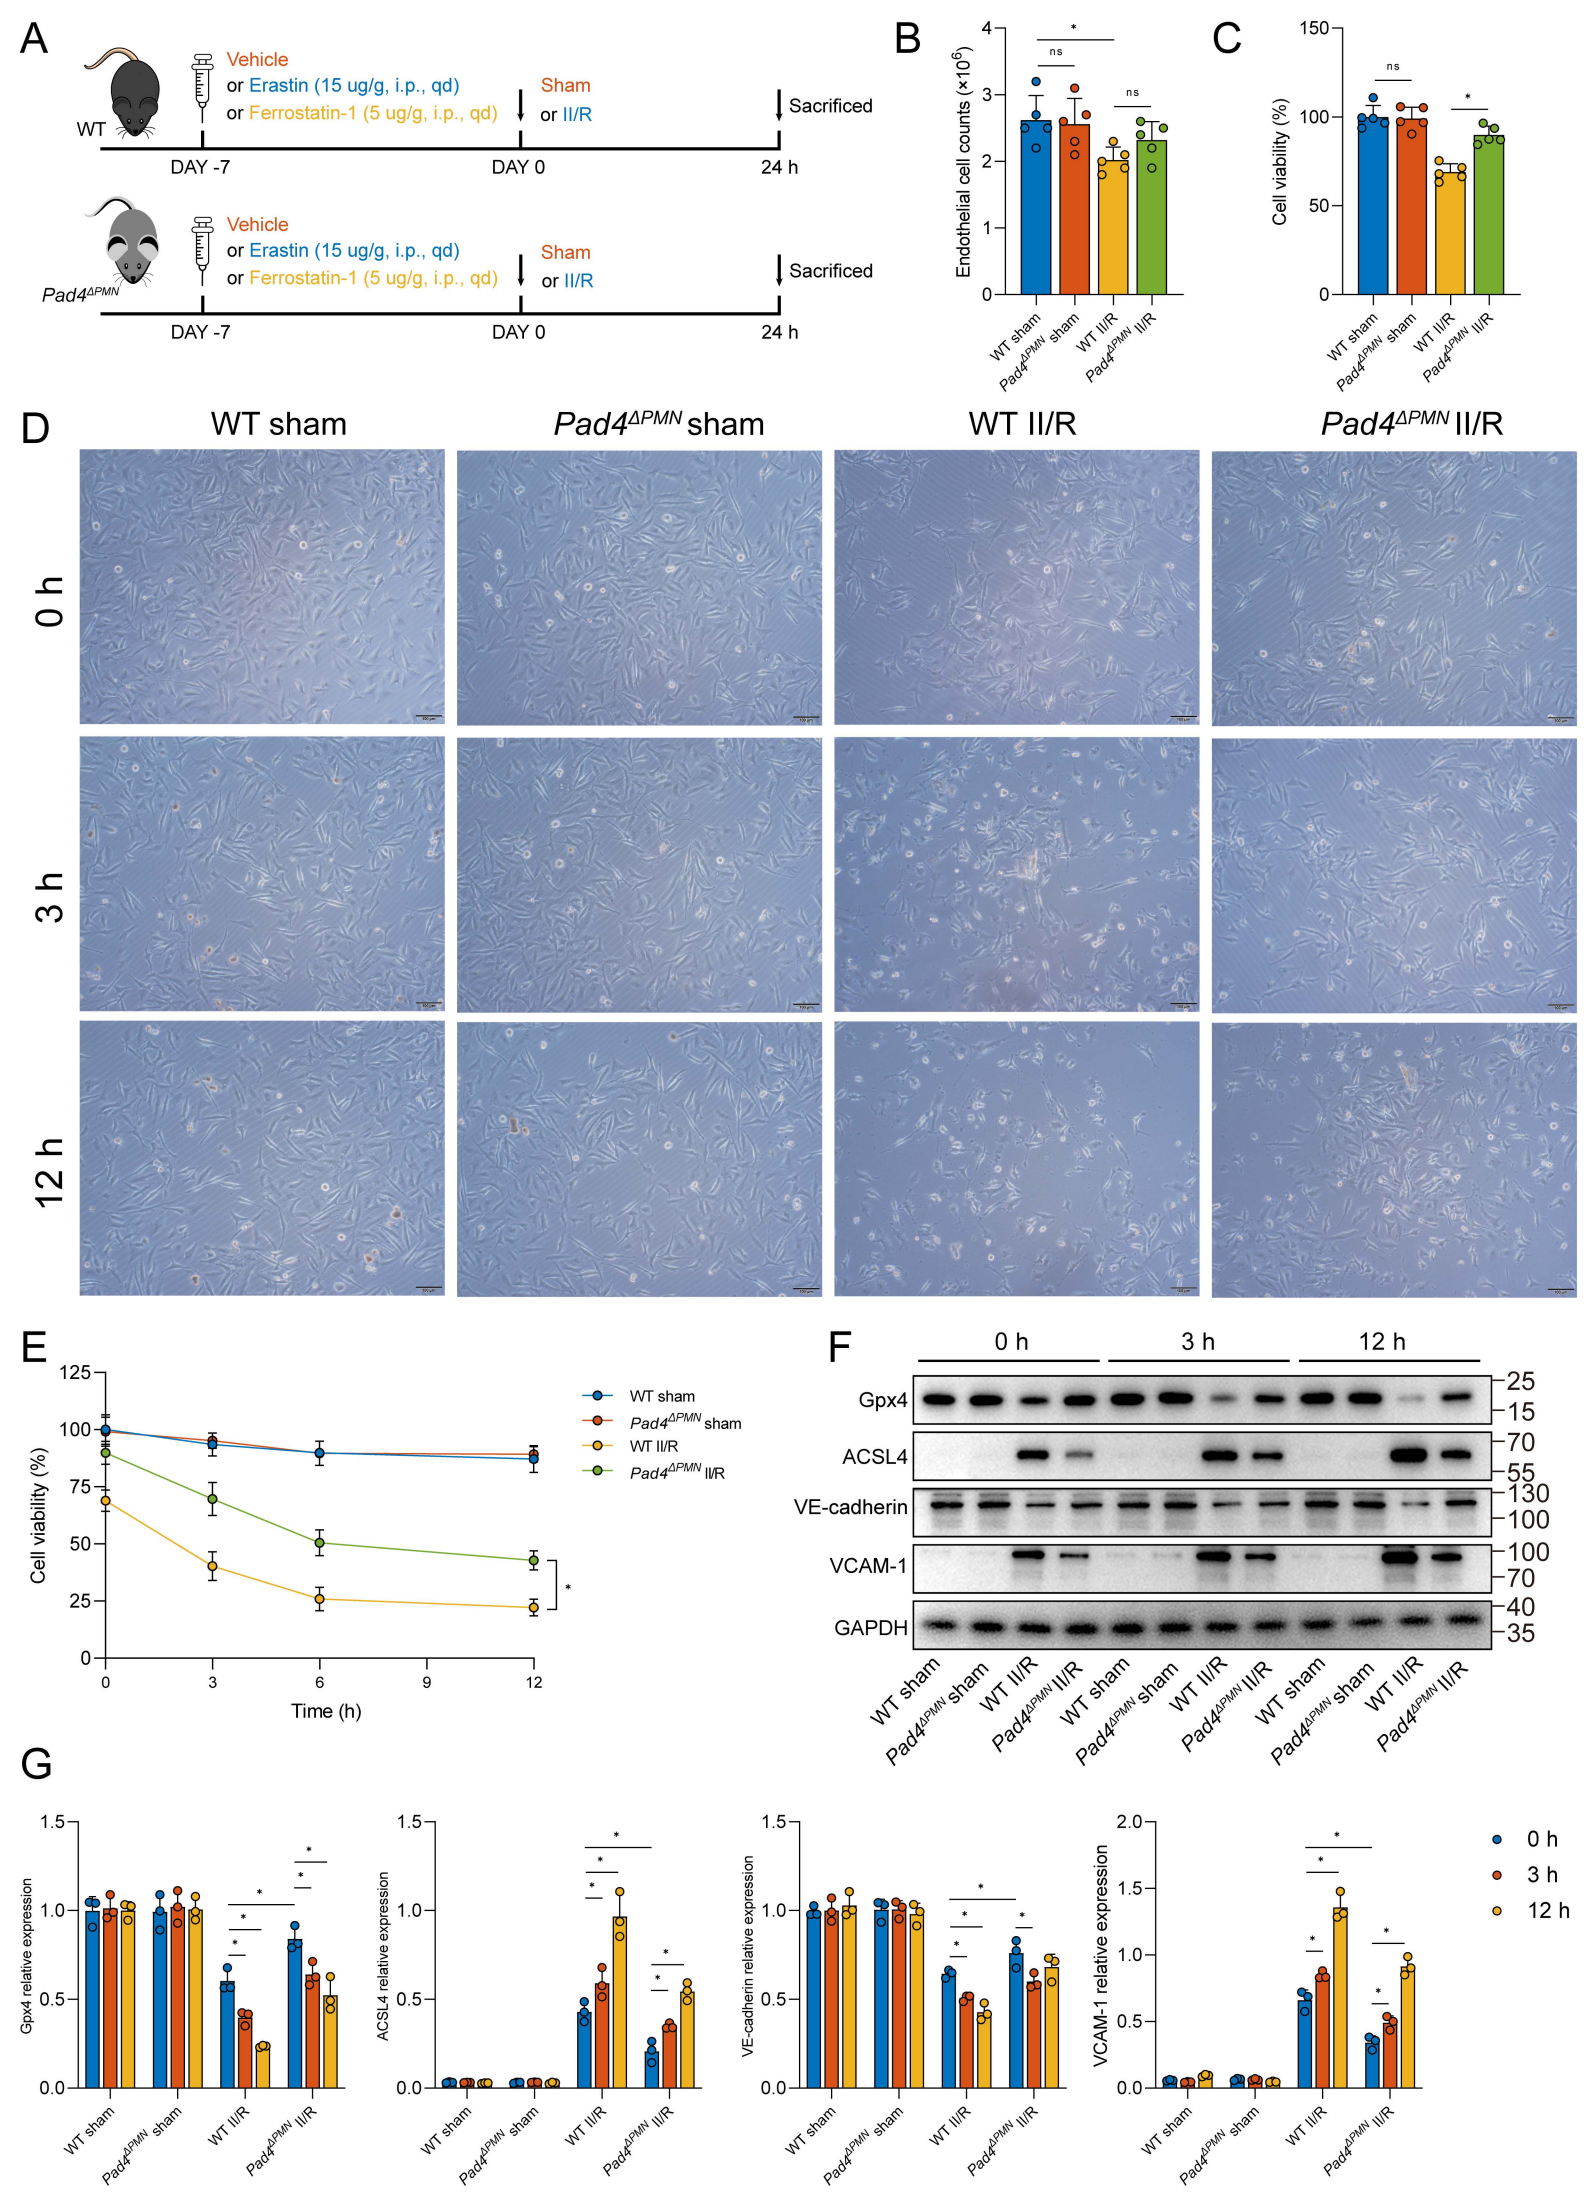

## Supplementary Figure 1

**A.** Schematic diagram of drug administration to WT and *Pad4*<sup>ΔPMN</sup> mice. The ferroptosis activator erastin, the ferroptosis inhibitor ferrostatin-1 and the vehicle were administered intraperitoneally for 7 days before II/R. **B.** Endothelial cell count was obtained by isolating them from a total of  $1 \times 10^8$  cells derived from the intestines. **C.** Cell viability of the recently isolated endothelial cells was assessed using the CCK8 assay kit. **D.** The morphology of extracted endothelial cells from the intestinal microvasculature was observed using an optical microscope at various incubation times (0 h, 3h, 12h) *in vitro*. **E.** The cell viability-time curves were estimated using CCK8 assay. **F-G.** Cellular ferroptosis levels (Gpx4 and ACSL4) and endothelial cell damage markers (VE-cadherin and VCAM-1) were detected using Western blotting. Data are shown as the means  $\pm$  SD, ns, not significant, \* $p < 0.05$ .

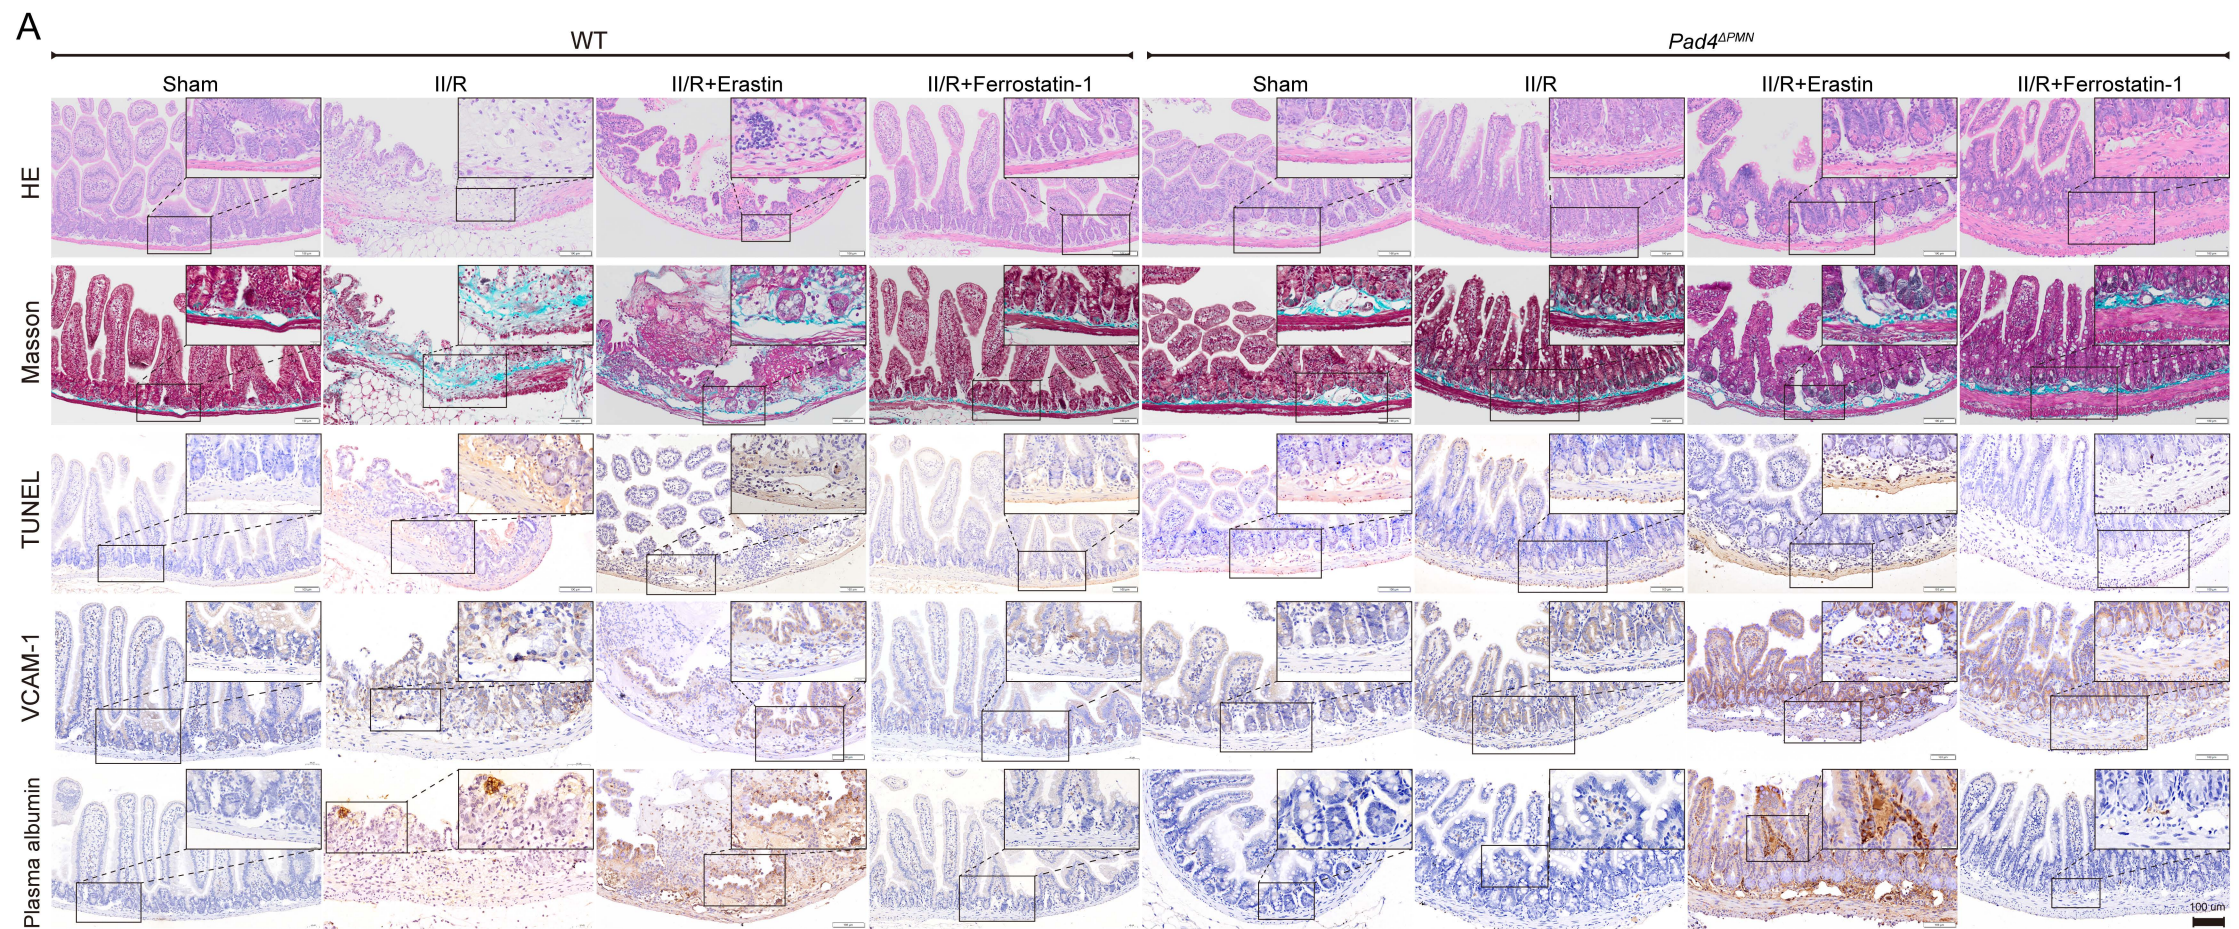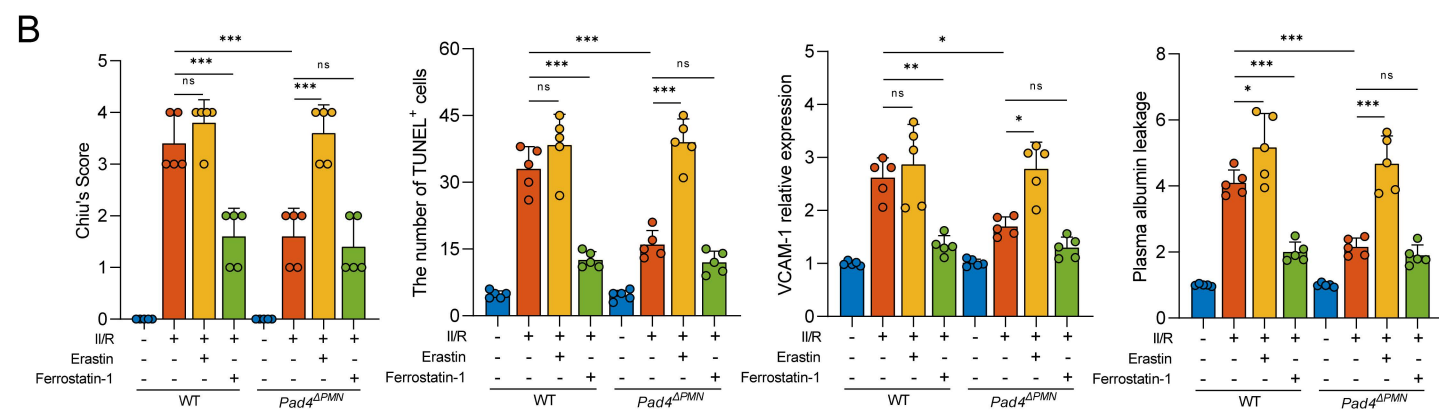

## **Supplementary Figure 2**

**A-B.** Intestinal tissue from mice was used for pathological analysis and immunohistochemical staining. The Chiu score system was used to assess HE- and Masson's trichrome-stained tissue samples from the intestine. To detect apoptosis of intestinal microvascular endothelial cells, TUNEL staining was performed, and the proportion of TUNEL-positive cells was determined. The quantification of VCAM-1 and albumin through immunohistochemical staining of intestinal sections was conducted to evaluate microvascular permeability and function. Data correspond to the means  $\pm$  SD, ns, not significant, \* $p < 0.05$ , \*\* $p < 0.01$ , \*\*\* $p < 0.001$ .

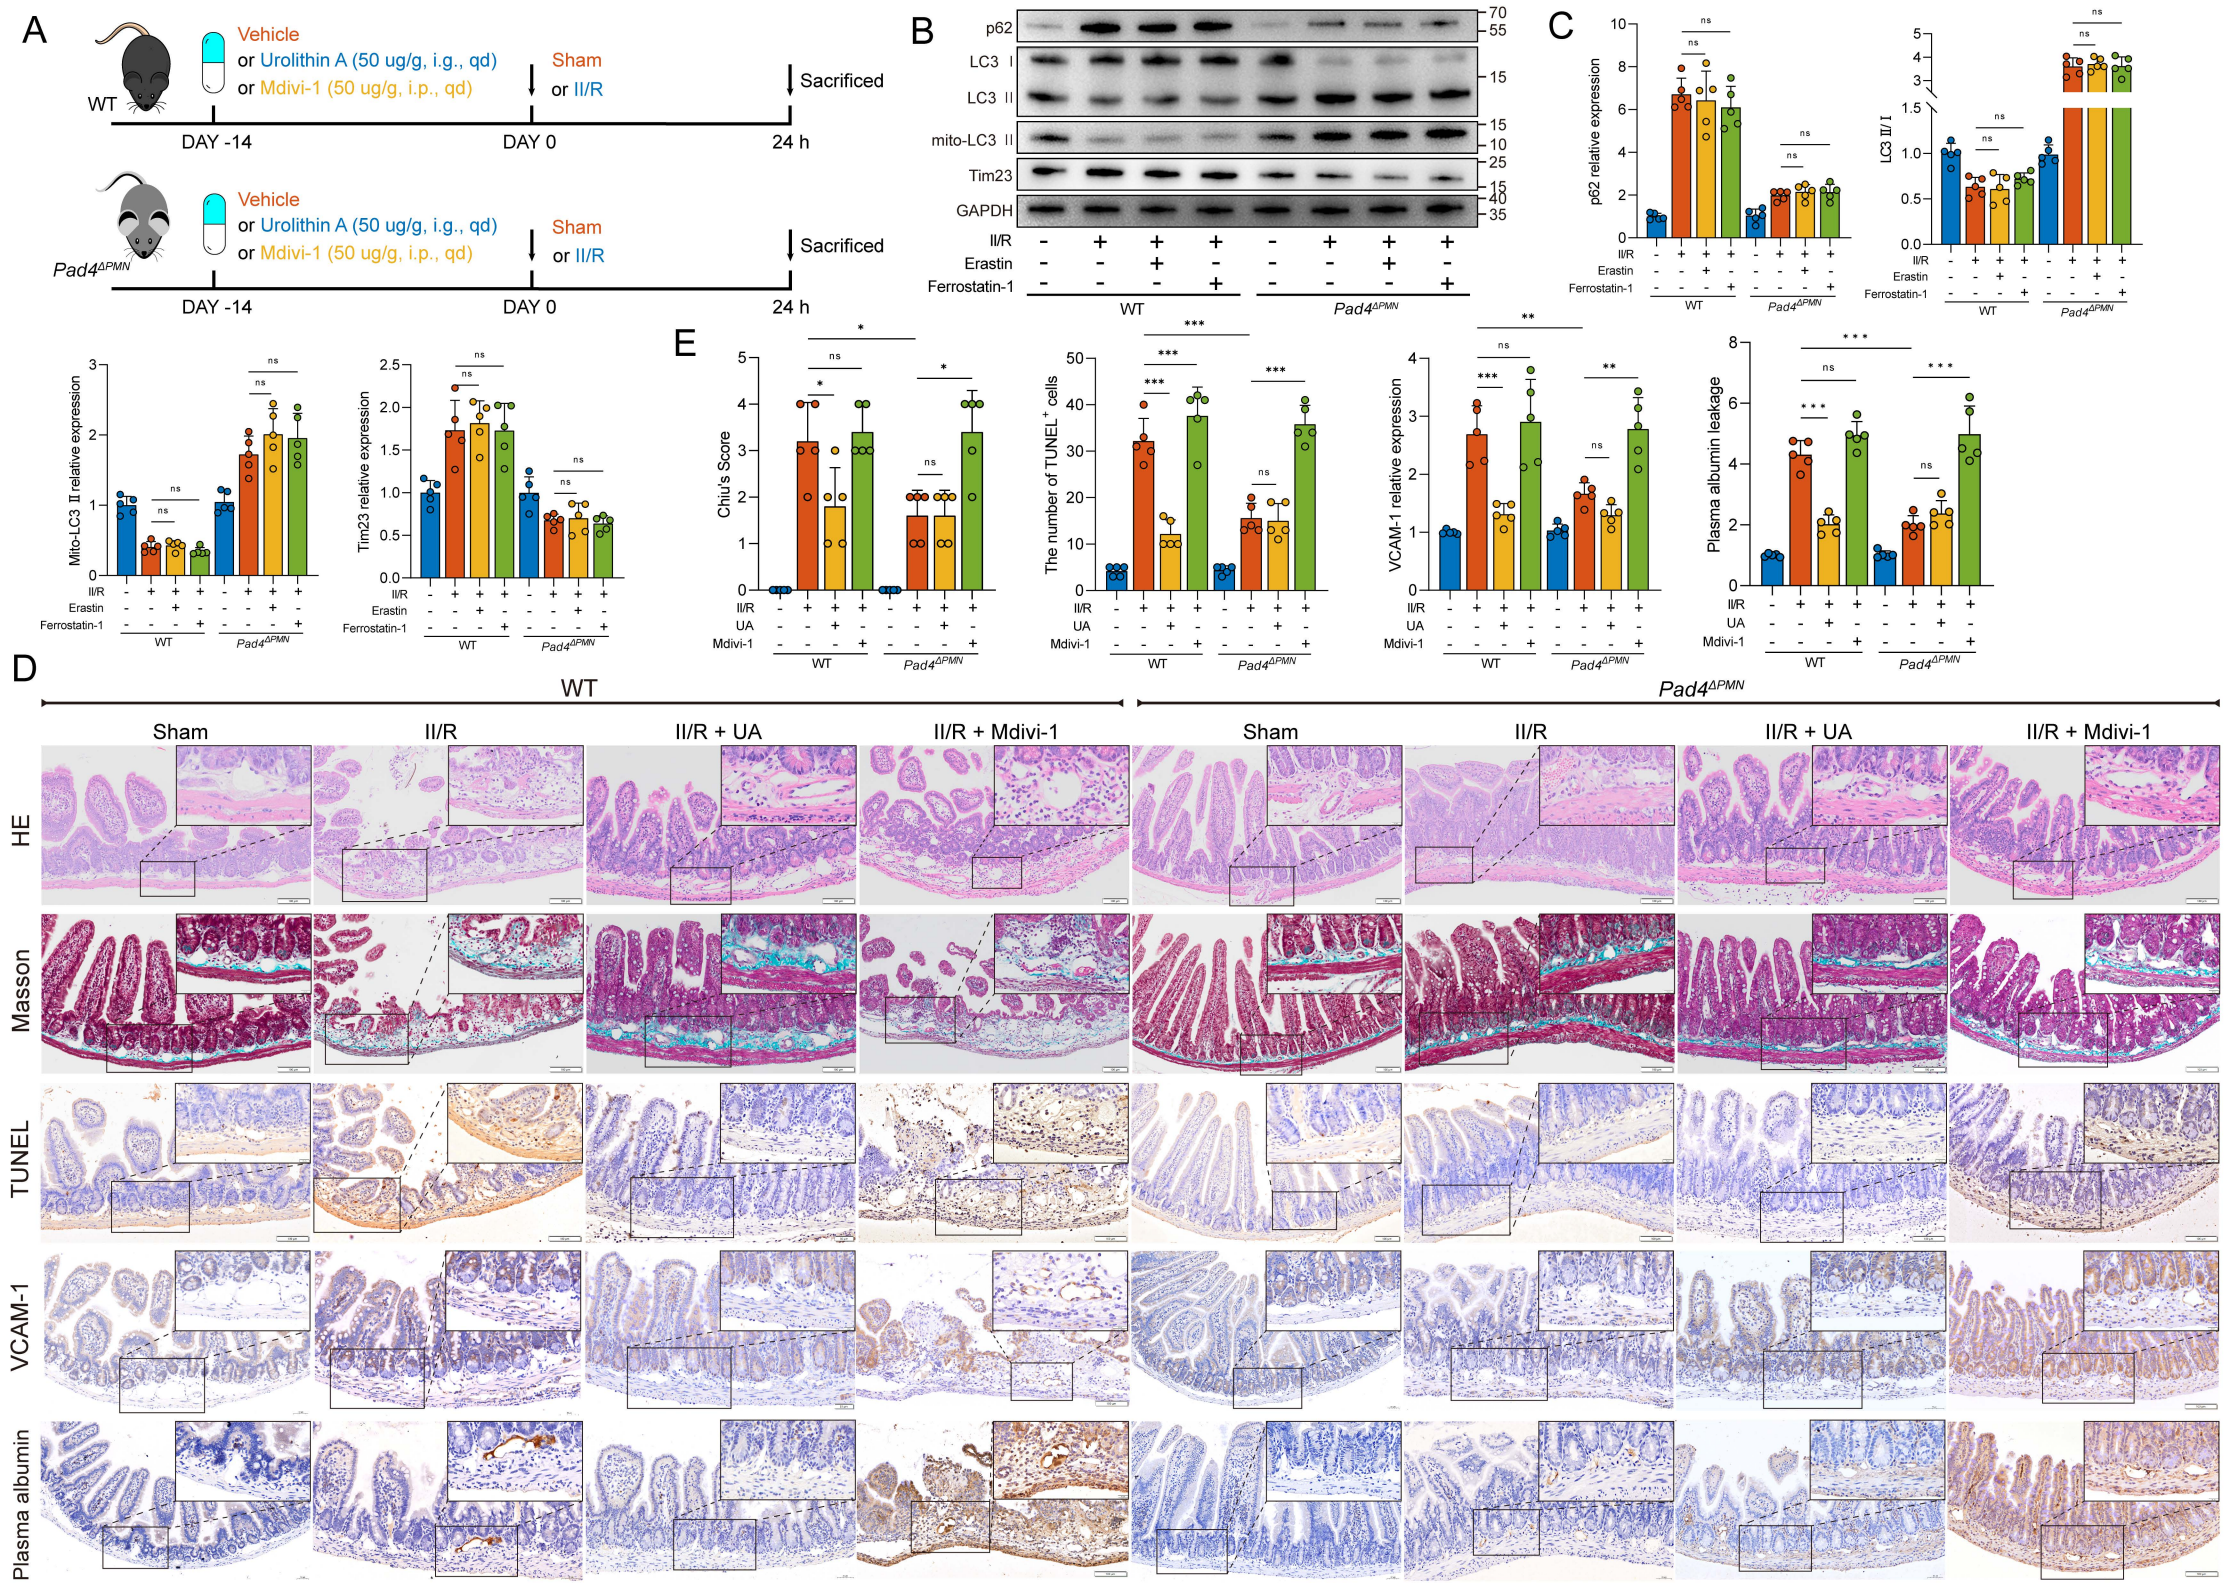

### Supplementary Figure 3

**A.** Schematic diagram depicting the drug administration process in both WT and *Pad4*<sup>ΔPMN</sup> mice. **B-C.** Effects of ferroptosis regulation on the degree of mitophagy were determined by western blot analysis. **D-E.** Pathological staining and immunohistochemistry were conducted to evaluate the impact of a mitophagy activator (UA) and inhibitor (Mdivi-1) on intestinal microvascular injury in WT and *Pad4*<sup>ΔPMN</sup> mice. UA, urolithin A; Mdivi-1, mitochondrial division inhibitor 1. Data are shown as the means ± SD, ns, not significant, \*p < 0.05, \*\*p < 0.01, \*\*\*p < 0.001.

**A**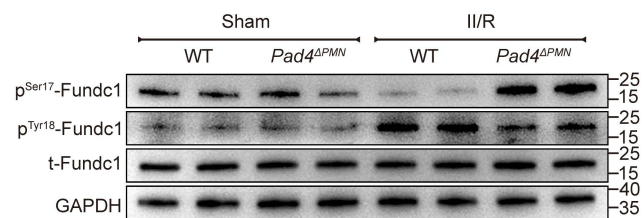**B**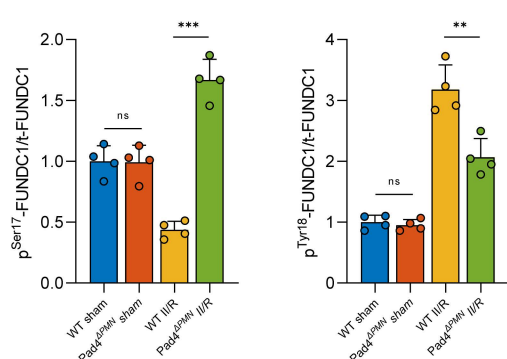**C**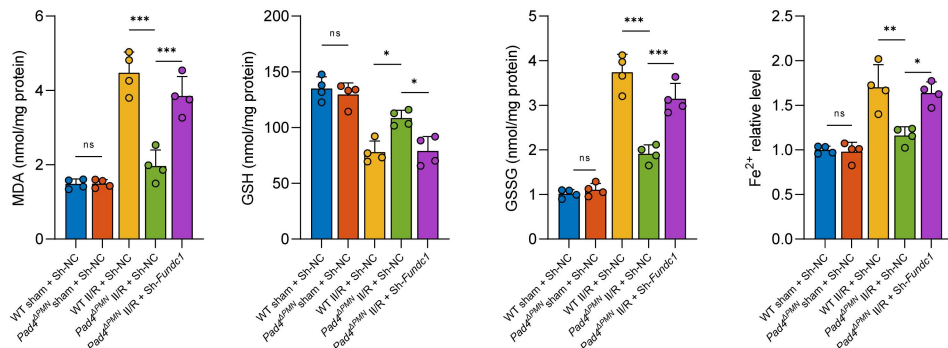**D**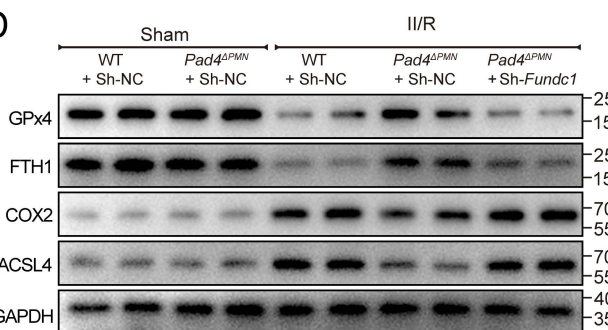**E**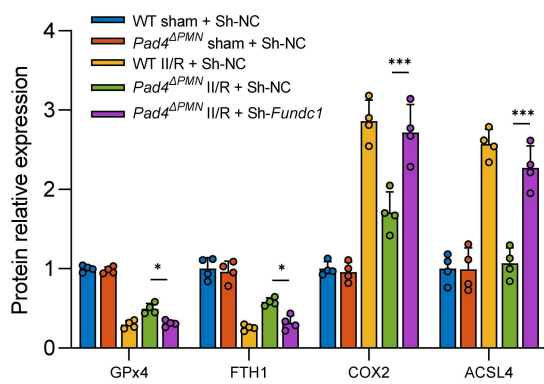**F**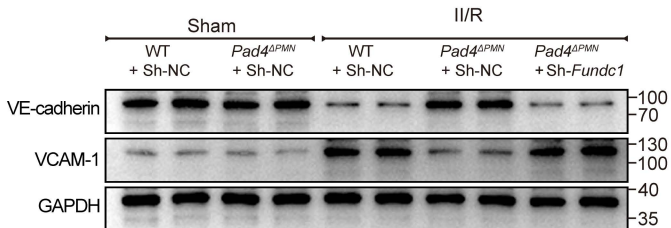**G**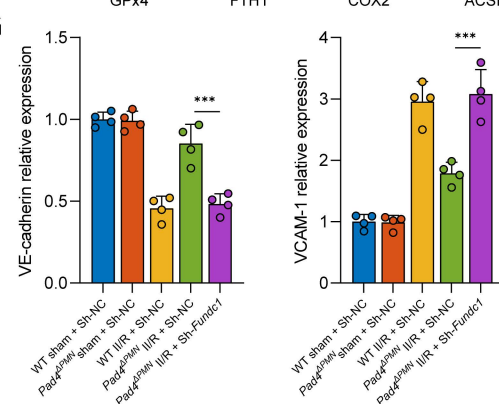**H**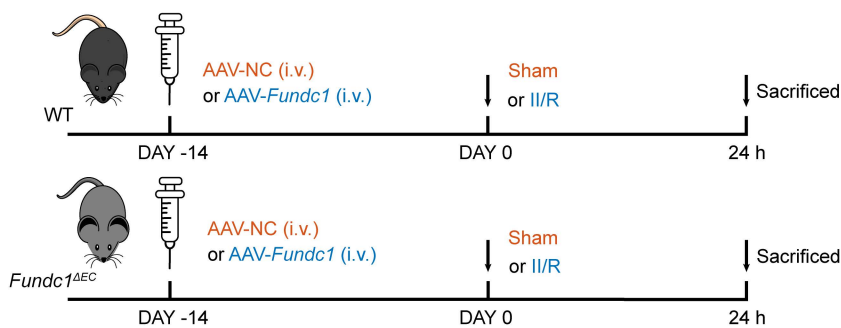

#### Supplementary Figure 4

**A-B.** Western blotting was performed to determine p<sup>Ser17</sup>-Fundc1 and p<sup>Tyr18</sup>-Fundc1 protein levels in WT and *Pad4<sup>APMN</sup>* mice. **C.** Intracellular MDA, GSH, GSSH and Fe<sup>2+</sup> levels in isolated intestinal endothelial cells were assessed by ELISAs. **D-E.** Levels of ferroptosis-related proteins in the intestinal endothelium of WT and *Pad4<sup>APMN</sup>* mice pretreated with or without a *Fundc1* shRNA were determined using western blotting. **F-G.** Western blotting was performed to examine the expression of the intestinal microvascular damage markers VCAM-1 and VE-cadherin. The grayscale values of the bands were determined using ImageJ. **H.** Schematic diagram of tail vein injection of AAV9 containing *Fundc1* or AAV9 control in WT and *Fundc1<sup>ΔEC</sup>* mice. AAV, adeno-associated virus. Data are presented as the means ± SD, ns, not significant, \*p < 0.05, \*\*p < 0.01, \*\*\*p < 0.001.
